# Supplementary material for: LINC00893 inhibits the progression of prostate cancer through miR-3173-5p/SOCS3/JAK2/STAT3 pathway
Source: Cancer Cell Int. 2022 Jul 10;22:228. doi: 10.1186/s12935-022-02637-4 (PMC9275192; doi:10.1186/s12935-022-02637-4)
Supplement: Supplementary file 1 — Additional file 1. Western blot grayscale raw data. [file 12935_2022_2637_MOESM1_ESM.xlsx]

## Sheet: Sheet1
Fig2G
PC-3
1	7290	26.326	0	99	191913	E-CA
2	9102	44.172	0	114	402050
1	7424	47.348	0	109	351508	GAPDH
2	8520	35.669	0	111	303896
3	9600	41.461	0	112	398027	VIM
4	9729	23.086	0	95	224607
5	11475	36.098	0	114	414226	N-CA
6	7440	43.915	0	115	326731
LNCaP
1	8000	24.505	0	108	196038	E-CA
2	6050	41.223	0	107	249399
3	8280	53.167	0	115	440220	GAPDH
4	10608	44.811	0	117	475356
5	10224	35.062	0	114	358472	VIM
6	8568	30.498	0	112	261309
7	12300	29.813	0	114	366696
8	9660	24.29	0	106	234637	N-CA
4F
PC3
1	10138	21.223	0	101	215154	E-CA
2	9372	35.24	0	101	330273
3	6307	43.283	0	103	272985
4	7056	36.657	0	106	258653	N-CA
5	8211	14.575	0	87	119678
6	4563	35.015	0	98	159775
7	9798	34.998	0	107	342908	VIM
8	7866	19.576	0	79	153981
9	8308	35.02	0	102	290943
10	11120	25.829	0	94	287218	GAPDH
11	9842	29.733	0	98	292636
12	9804	30.988	0	102	303810
LNCaP
13	7076	10.011	0	84	70837	E-CA
14	8228	23.247	0	103	191273
15	8316	19.196	0	103	159631
16	13832	31.821	0	110	440147	N-CA
17	7296	20.411	0	85	148920
18	9588	39.12	0	113	375082
19	8494	44.112	0	107	374689	VIM
20	8118	20.706	0	98	168090
21	9360	32.761	0	111	306640
22	6760	40.164	0	100	271510	GAPDH
23	6670	41.594	0	99	277429
24	7965	35.763	0	96	284856
fig5B
PC3
1	7524	24.038	0	101	180862	SOC3
2	7638	20.015	0	87	152877
3	8990	42.557	0	125	382583	GAPDH
4	8844	37.027	0	123	327467
LNCaP
5	10800	35.481	0	126	383200	SOC3
6	8704	32.123	0	119	279597
7	10508	40.93	0	126	430089	GAPDH
8	9017	36.249	0	126	326857
fig5D
PC3
1	10080	17.148	0	99	172847	SOC3
2	6630	29.429	0	96	195116
3	9088	41.175	0	118	374194	GAPDH
4	8062	45.36	0	116	365695
LNCaP
5	12180	11.156	0	69	135878	SOC3
6	9360	27.635	0	102	258664
7	7018	40.956	0	112	287432	GAPDH
8	6490	34.856	0	97	226216
fig5E
PC3
1	9724	12.794	0	77	124410	SOC3
2	7614	42.606	0	116	324400
3	5814	19.784	0	82	115023
4	12298	37.985	0	122	467136	GAPDH
5	9417	50.811	0	120	478485
6	7381	53.298	0	122	393392
LNCaP 7	6048	28.955	0	112	175121	SOC3
8	9600	51.432	0	120	493746
9	6032	42.243	0	115	254812
10	11480	34.96	0	119	401338	GAPDH
11	7920	55.133	0	123	436654
12	7680	46.886	0	124	360086
fig5F
1	7616	50.01	0	119	380878	SOC3
2	6213	4.683	0	20	29095
3	6760	31.285	0	107	211484
4	6696	36.213	0	112	242483
5	5488	14.981	0	67	82218
6	8970	55.791	0	124	500446	GAPDH
7	7112	62.089	0	123	441577
8	7623	56.633	0	120	431717
9	6985	59.517	0	122	415728
10	9576	47.701	0	125	456785
6A
1	8946	28.553	0	105	255433
2	7208	21.468	0	91	154743
3	8379	33.516	0	114	280827
4	6985	32.159	0	108	224634
5	10008	36.971	0	118	370008
6	8448	22.235	0	98	187844
7	7905	54.4	0	124	430031
8	8255	51.78	0	125	427440
6G
1	8584	23.443	0	95	201238
2	4902	55.597	1	107	272535
3	6027	39.842	0	101	240129
4	10368	30.757	0	112	318884
5	7579	32.966	0	106	249853
6	9648	35.764	0	110	345048
7	10530	39.446	0	118	415363
8	8896	32.566	0	114	289703
9	9514	41.124	0	119	391253
10	9581	29.484	0	112	282489
11	7938	32.237	0	108	255899
12	7656	35.217	0	110	269623
13	6762	20.551	0	80	138964
14	8540	32.853	0	99	280563
15	7540	17.708	0	70	133518
16	8448	25.779	0	90	217777
17	7830	12.081	0	51	94595
18	8192	15.734	0	77	128889
19	8568	42.528	0	115	364383
20	8468	24.869	0	101	210590
21	11786	29.012	0	112	341933
22	12528	24.797	0	112	310655
23	8568	33.244	0	107	284838
24	8228	34.722	0	105	285693
7A
1	8316	18.907	0	97	157227
2	9675	39.191	0	125	379177
3	8643	31.715	0	117	274117
4	9600	57.869	0	134	555542
5	6270	15.957	0	71	100048
6	7980	47.106	0	134	375904
7	9211	50.836	0	137	468255
8	9108	51.393	0	139	468087
9	9720	51.318	0	144	498810
10	9796	41.781	0	138	409284
11	8349	28.343	0	127	236636
12	10360	38.947	0	138	403492
13	12069	25.785	0	124	311194
14	10530	31.121	0	120	327704
15	6448	40.008	0	112	257971
16	10074	41.816	0	133	421254
17	9380	44.923	0	134	421381
18	8190	54.919	0	132	449785
7B
1	6858	12.777	0	52	87627
2	6431	38.991	0	99	250754
3	6897	18.095	0	70	124800
4	8083	22.98	0	97	185750
5	7540	9.483	0	42	71502
6	7749	27.731	0	102	214888
7	8832	15.797	0	62	139515
8	8400	16.272	0	62	136683
9	8184	12.526	0	48	102513
10	11088	24.604	0	115	272808
11	6372	6.163	0	40	39269
12	8378	22.77	0	93	190770
13	10425	29.715	0	96	309784
14	10416	33.037	0	96	344118
15	8228	31.863	0	87	262165
16	7250	50.29	0	117	364600
17	9030	39.064	0	113	352751
18	8382	38.712	0	115	324487
8e
1	7112	28.086	0	102	199748
2	8280	39.315	0	115	325530
3	8784	30.803	0	115	270575
4	9652	40.925	0	118	395008
5	9246	35.98	0	124	332667
6	6192	38.034	0	118	235507
7	9086	50.581	0	126	459582
8	8120	32.903	0	121	267169
9	8960	50.264	0	126	450364
10	8946	43.944	0	127	393123

## Sheet: Figure 1
Figure 2
			GAPDH			AVG	E-Ca			E-Ca/GAPDH			AVG	After normalization to control			N-Ca			N-Ca/GAPDH				After normalization to control			VIM			VIM/GAPDH				After normalization to control
2G	PC-3	pcDNA	351508	345617	301578	332901	191913	125645	184523	0.576487	0.377425	0.554288	0.502733	1.14671	0.750745	1.10255	414226	421867	405285	1.24429	1.26724	1.21743	1.24299	1.00105	1.01951	0.97944	398027	410525	345869	1.19563	1.23317	1.03895	1.15592	1.03435	1.06683	0.898812
		pcDNA-LINC00893	303896	342561	315685	320714	312050	364156	379896	0.972985	1.13545	1.18453		1.93539	2.25856	2.35618	216731	262456	282025	0.675777	0.818349	0.879366		0.54367	0.658371	0.70746	224607	185562	164558	0.700334	0.57859	0.513099		0.605867	0.500545	0.443888
	LNCaP	pcDNA	440220	393561	441568	425116	196038	155624	231456	0.46114	0.366074	0.544453	0.457222	1.00857	0.800648	1.19078	366696	424125	301562	0.862578	0.997668	0.709363	0.856537	1.00705	1.16477	0.828177	358472	282563	395123	0.843233	0.664672	0.929447	0.812451	1.03789	0.818108	1.144
		pcDNA-LINC00893	475356	485126	442561	467681	359399	325403	384569	0.76847	0.69578	0.822289		1.68074	1.52175	1.79844	214637	191035	270546	0.458939	0.408473	0.578484		0.535808	0.476889	0.675376	261309	221356	274562	0.558733	0.473306	0.587071		0.687714	0.582565	0.722593
4F			GAPDH			AVG	E-Ca			E-Ca/GAPDH			AVG	After normalization to control			N-Ca			N-Ca/GAPDH				After normalization to control			VIM			VIM/GAPDH				After normalization to control
	PC3	pcDNA	287218	312561	302459	300746	215154	175426	201256	0.715401	0.583303	0.669189	0.655964	1.09061	0.889229	1.02016	258653	245621	284562	0.860038	0.816706	0.946187	0.87431	0.983676	0.934114	1.08221	342908	354261	334562	1.14019	1.17794	1.11244	1.14352	0.997085	1.18138	0.941642
		pcDNA-LINC00893	292636	312452	284562	296550	430273	408456	381526	1.45093	1.37736	1.28655		2.2119	2.09975	1.96131	119678	154562	102456	0.403568	0.5212	0.345493		0.461584	0.596128	0.395161	153981	92423	132365	0.519241	0.311661	0.44635		0.454071	0.272544	0.390328
		pcDNA-LINC00893+miR-3173-5p	303810	324156	304495	310820	312985	294569	279854	1.00696	0.947715	0.900372		1.53509	1.44477	1.37259	219775	185230	225896	0.707081	0.595939	0.726774		0.808729	0.681611	0.831254	300943	260256	330256	0.968222	0.83732	1.06253		0.8467	0.732227	0.929172
			GAPDH			AVG	E-Ca			E-Ca/GAPDH			AVG	After normalization to control			N-Ca			N-Ca/GAPDH				After normalization to control			VIM			VIM/GAPDH				After normalization to control
	LNCaP	pcDNA	271510	275896	254136	267181	70837	74521	71523	0.265128	0.278916	0.267695	0.27058	0.979851	1.03081	0.98934	440147	421589	451245	1.64738	1.57792	1.68891	1.63807	1.00568	0.963279	1.03104	324689	398542	421256	1.21524	1.49166	1.57667	1.42786	0.851095	1.04468	1.10422
		pcDNA-LINC00893	277429	284562	265785	275925	121273	114162	134526	0.439514	0.413742	0.487545		1.62434	1.5291	1.80185	128920	182456	195234	0.467228	0.661251	0.707561	0.612013	0.285231	0.403677	0.431948	199890	235264	264236	0.724435	0.852636	0.957636		0.507358	0.597144	0.670681
		pcDNA-LINC00893+miR-3173-5p	284856	295865	301254	293992	99631	85423	108596	0.338891	0.290563	0.369385		1.25246	1.07385	1.36516	335082	345426	412053	1.13977	1.17495	1.40158	1.23877	0.695799	0.717279	0.85563	356640	402569	445426	1.2131	1.36932	1.5151		0.849592	0.959005	1.0611
5B			GAPDH				SOC3			SOC3/GAPDH			AVG	After normalization to control
	PC3	miR-NC	382583	401256	395462	393100	180862	189652	201236	0.460091	0.482452	0.51192	0.484821	0.948992	0.995113	1.0559
		miR-3173-5p	327467	332569	342562	334199	60877	75236	84952	0.182158	0.225123	0.254196		0.375722	0.464343	0.524308
			GAPDH				SOC3			SOC3/GAPDH			AVG	After normalization to control
	LNCaP	miR-NC	430089	421562	452136	434596	343200	398542	442563	0.7897	0.917041	1.01833	0.908358	0.869371	1.00956	1.12107
		miR-3173-5p	326857	356984	341256	341699	159597	129654	205698	0.467069	0.379439	0.601986		0.514191	0.41772	0.662719
fig5D			GAPDH				SOC3			SOC3/GAPDH			AVG	After normalization to control
	PC3	NC inhibitor	374194	398512	342562	371756	172847	205263	144236	0.464947	0.552144	0.387986	0.468359	0.992716	1.17889	0.828393
		miR-3173-5p inhibitor	365695	384526	345261	365161	375116	331025	325246	1.02726	0.906519	0.890693		2.19332	1.93552	1.90173
			GAPDH				SOC3			SOC3/GAPDH			AVG	After normalization to control
	LNCaP	NC inhibitor	287432	298456	274516	286801	135878	145263	124536	0.47377	0.506493	0.434224	0.471496	1.00482	1.07423	0.920949
		miR-3173-5p inhibitor	226216	245612	210245	227358	163664	175563	152563	0.719853	0.772189	0.671026		1.52674	1.63774	1.42319
			GAPDH				SOC3			SOC3/GAPDH			AVG	After normalization to control
fig5E	PC3	pcDNA	467136	485962	421563	458220	124410	152364	102456	0.271507	0.332513	0.223595	0.275872	0.984178	1.20532	0.810505
		pcDNA-LINC00893	478485	489652	452639	473592	224400	229260	241256	0.473826	0.484088	0.509417		1.71756	1.75476	1.84657
		pcDNA-LINC00893 +miR-3173-5p	393392	421536	348126	387685	141023	125634	132452	0.363757	0.324062	0.341649		1.31857	1.17469	1.23843
			GAPDH				SOC3			SOC3/GAPDH			AVG	After normalization to control
	LNCaP	pcDNA	401338	425631	395620	407530	205121	186952	134258	0.503328	0.458745	0.329444	0.430505	1.16916	1.0656	0.765248
		pcDNA-LINC00893	436654	452631	412563	433949	433746	402536	425698	0.999531	0.927611	0.980985		2.32176	2.1547	2.27868
		pcDNA-LINC00893 +miR-3173-5p	360086	386592	345261	363980	239812	226542	209562	0.658861	0.622403	0.575752		1.53044	1.44575	1.33739
			GAPDH				SOC3			SOC3/GAPDH			AVG	After normalization to control
fig5F		RWPE-1	500446	521563	485621	502543	380878	425426	324261	0.757901	0.846546	0.64524	0.749896	1.01068	1.12889	0.86044
		PC-3	441577	452145	421563	438428	48095	85125	100456	0.109699	0.194159	0.229128		0.146285	0.258915	0.305546
		DU145	431717	485621	401256	439531	201484	185610	243246	0.458406	0.422291	0.553421		0.611294	0.563133	0.737998
		VCaP	415728	425631	395426	412262	262483	224521	220512	0.63669	0.544608	0.534884		0.849039	0.726245	0.713277
		LNCaP	456785	484256	421503	454181	119218	85623	151126	0.26249	0.188522	0.332744		0.350035	0.251397	0.44372
6A			GAPDH				SOC3			SOC3/GAPDH			AVG	After normalization to control
	PC3	si-NC	280827	298456	275426	284903	255433	294523	215136	0.896561	1.03377	0.75512	0.895149	1.00158	1.03214	0.731608
		si-SOCS3	224634	245621	201543	223933	104743	125624	92246	0.467743	0.56099	0.411936		0.522531	0.6267	0.460187
			GAPDH				SOC3			SOC3/GAPDH			AVG	After normalization to control
	LNCaP	si-NC	430031	452316	401256	427868	370008	384562	354126	0.864772	0.898787	0.827653	0.863737	1.0012	0.897712	0.921958
		si-SOCS3	427440	452130	401256	426942	257844	231562	282453	0.603932	0.542373	0.661572		0.699208	0.627938	0.765941
6G			GAPDH			AVG	E-Ca			E-Ca/GAPDH			AVG	After normalization to control			N-Ca			N-Ca/GAPDH				After normalization to control			VIM			VIM/GAPDH			AVG	After normalization to control
	PC3	NC inhibitor	282489	301256	264512	282752	201238	231536	195623	0.711711	0.818865	0.691853	0.74081	0.960721	1.10536	0.933914	318884	324256	331256	1.12779	1.14678	1.17154	1.1487	0.98179	0.998329	1.01988	415363	472361	365624	1.469	1.67058	1.29309	1.47756	0.994208	1.13064	0.875154
		miR-3173-5p inhibitor	255899	231564	275896	254453	292535	315612	338256	1.14966	1.24035	1.32935		1.5519	1.67432	1.79445	125853	194562	164569	0.494602	0.764628	0.646756		0.431295	0.666759	0.563973	239703	272569	219869	0.942033	1.0712	0.864085		0.637561	0.724978	0.584807
		miR-3173-5p inhibitor+ si-SOCS3	269623	284562	241536	265240	245129	224589	269236	0.924177	0.846738	1.01506		1.24752	1.14299	1.37021	285048	315264	350962	1.07468	1.1886	1.32318		0.937123	1.03646	1.15382	321253	315631	365429	1.21118	1.18998	1.37773		0.819716	0.805371	0.932436
			GAPDH			AVG	E-Ca			E-Ca/GAPDH			AVG	After normalization to control			N-Ca			N-Ca/GAPDH				After normalization to control			VIM			VIM/GAPDH			AVG	After normalization to control
	LNCaP	NC inhibitor	310655	345621	284569	313615	138964	154260	124523	0.443104	0.491877	0.397057	0.444013	0.997953	1.1078	0.894247	217777	254623	185692	0.694409	0.811897	0.592102	0.699469	0.992765	1.16073	0.846502	364383	384263	354262	1.16188	1.22527	1.12961	1.17225	0.991152	1.04523	0.963622
		miR-3173-5p inhibitor	284838	264521	312564	287308	280563	284562	264520	0.976525	0.990443	0.920685		2.19932	2.23067	2.07356	87595	62536	61025	0.304882	0.217662	0.212403		0.435877	0.311182	0.303663	160590	173462	112564	0.558948	0.60375	0.391789		0.476815	0.515034	0.334219
		miR-3173-5p inhibitor+ si-SOCS3	285693	301256	265489	284146	183518	205623	171564	0.645858	0.723653	0.603788		1.45459	1.6298	1.35984	173889	148361	192536	0.611971	0.522129	0.677595		0.874907	0.746465	0.968728	348933	365249	425426	1.22801	1.28543	1.49721		1.04756	1.09654	1.27721
			GAPDH				SOCS3			SOCS3/GAPDH				After normalization to control			p-JAK2							After normalization to control			JAK2			JAK2/GAPDH			AVG	After normalization to control			p-STAT3			p-STAT3/GAPDH			AVG	After normalization to control			STAT3
7A	PC-3	pcDNA	421254	452136	401259	424883	157227	154692	175469	0.370048	0.364081	0.412982	0.38237	0.967773	0.95217	1.08006	555542	591263	541236	1.30752	1.39159	1.27385	1.32432	0.987314	1.0508	0.961889	468255	485629	432562	1.10208	1.14297	1.01807	1.08771	1.01321	1.05081	0.93598	409284	482361	365624	0.963286	1.13528	0.860529	0.986365	0.976602	1.15097	0.872424	311194	331256	294562
		pcDNA-LINC00893	421381	452159	394569	422703	319177	332369	281269	0.755086	0.786294	0.665406		1.97475	2.05637	1.74021	199048	135365	259456	0.470893	0.320237	0.613802		0.355574	0.241812	0.463485	468087	485623	445623	1.10737	1.14885	1.05422		1.01807	1.05621	0.969215	276636	289932	321253	0.654445	0.6859	0.759997		0.663492	0.695382	0.770503	327704	342562	301256
		pcDNA-LINC00893+miR-3173-5p	449785	485629	401236	445550	230117	241569	264139	0.516479	0.542182	0.592838		1.35073	1.41795	1.55043	495904	452315	539563	1.11302	1.01518	1.211		0.840444	0.766571	0.914436	498810	501236	475236	1.11954	1.12498	1.06663		1.02926	1.03427	0.98062	333492	292361	355262	0.748495	0.65618	0.797356		0.758842	0.665251	0.808378	257971	286541	221536
																								p-JAK2/JAK2										AVG										p-STAT3/STAT3
																								0.987314	1.0508	0.961889								1										0.976602	1.15097	0.872424
																								0.350492	0.238356	0.456861								1.0145										0.63664	0.667239	0.739321
																								0.828254	0.755453	0.901173								1.01472										0.973347	0.8533	1.03689
			GAPDH				SOCS3			SOCS3/GAPDH				After normalization to control			p-JAK2							After normalization to control			JAK2			JAK2/GAPDH			AVG	After normalization to control			p-STAT3			p-STAT3/GAPDH			AVG	After normalization to control			STAT3
	LNCaP	pcDNA	364600	384269	341256	363375	87627	94562	75896	0.241148	0.260233	0.208864	0.236748	1.01858	1.0992	0.882221	185750	198562	152364	0.51118	0.546438	0.419302	0.492307	1.03834	1.10995	0.851709	139515	152365	102536	0.383942	0.419305	0.282177	0.361808	1.06118	1.15892	0.779908	272808	295623	254263	0.750762	0.813548	0.699726	0.754679	0.99481	1.07801	0.927184	309784	321562	286541
		pcDNA-LINC00893	352751	384569	321598	352973	200754	208954	189569	0.568752	0.591984	0.537064		2.40235	2.50048	2.26851	111502	94523	94259	0.315894	0.267791	0.267043		0.641661	0.543952	0.542433	136683	152364	112536	0.387234	0.431659	0.318824		1.07027	1.19306	0.881195	105269	140126	97125	0.298236	0.396988	0.275163		0.395182	0.526036	0.364609	344118	301256	384562
		pcDNA-LINC00893+miR-3173-5p	324487	345698	301569	323918	114800	101269	96456	0.354411	0.312638	0.297779		1.49699	1.32055	1.25779	204888	156123	175623	0.63253	0.481983	0.542184		1.28483	0.97903	1.10131	102513	152364	102454	0.316478	0.470378	0.316296		0.874713	1.30008	0.87421	195770	171365	165236	0.604381	0.529038	0.510117		0.800846	0.701011	0.675939	262165	284562	214563
																								p-JAK2/JAK2										AVG										p-STAT3/STAT3
																								1.03834	1.10995	0.851709								1										0.99481	1.07801	0.927184
																								0.612168	0.51895	0.517501								1.04818										0.342107	0.455387	0.315641
																								1.26418	0.963296	1.08361								1.01633										0.860732	0.753432	0.726485
			GAPDH				SOCS3			SOCS3/GAPDH			AVG	After normalization to control			E-cadherin			E-Ca/GAPDH			AVG	After normalization to control			N-cadherin			N-cadherin/GAPDH			AVG	After normalization to control			vimentin			vimentin/GAPDH			AVG	After normalization to control
8e		pcDNA	450364	489652	445136	461717	199748	235623	164256	0.43262	0.510319	0.35575	0.432896	0.999361	1.17885	0.821791	270575	315864	231423	0.586019	0.684107	0.501222	0.590449	0.992496	1.15862	0.848883	332667	358695	301256	0.720499	0.776871	0.652468	0.716613	1.00542	1.08409	0.910489	459582	505623	401569	0.995375	1.09509	0.869729	0.986732	1.00876	1.10982	0.881424
		pcDNA-LINC00893	393123	418965	374569	395552	279530	315921	301258	0.706683	0.798683	0.761614		1.63245	1.84498	1.75934	331008	315698	364526	0.836825	0.798119	0.921562		1.41727	1.35172	1.56078	180507	198698	151536	0.456342	0.50233	0.3831		0.636803	0.700979	0.534598	277169	230562	201569	0.700714	0.582886	0.509589		0.710136	0.590724	0.516441
[truncated: 7 more columns]
